# Supplementary material
Source: Springer Nature journal article supplement (https://www.springermedizin.de/resource/supplementary/12885_2011_2997_MOESM8_ESM.pdf/9462498)

## UMRC2 Cells

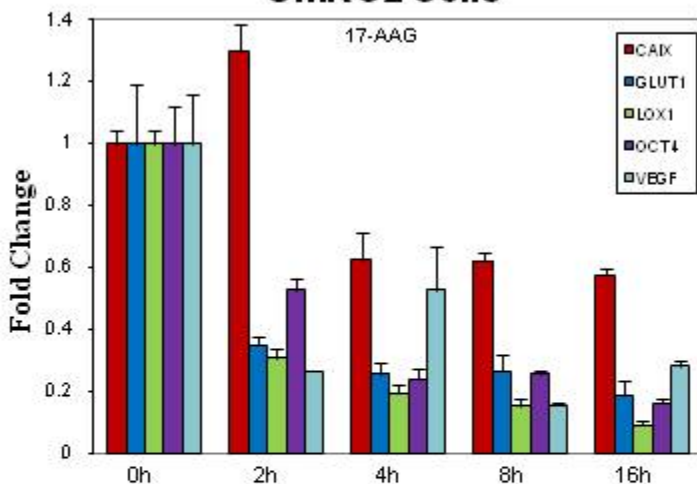

## 786-O Cells

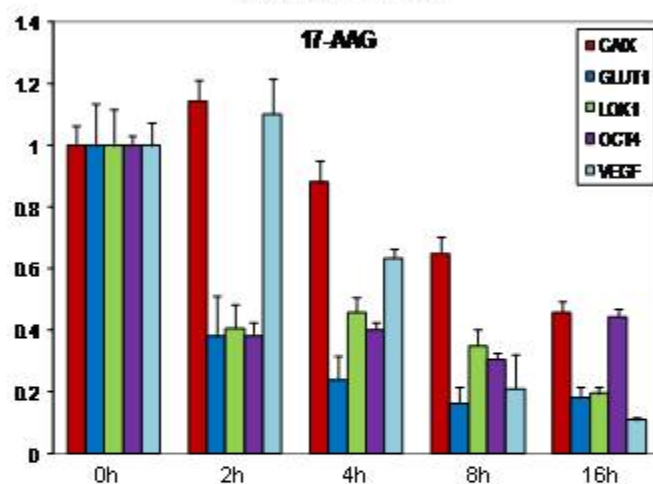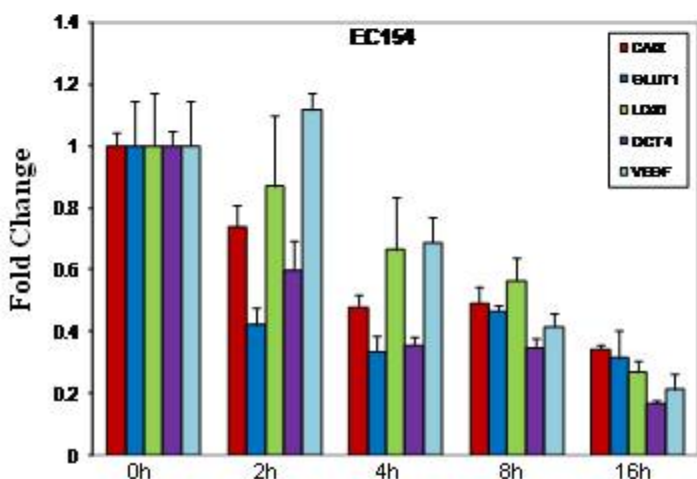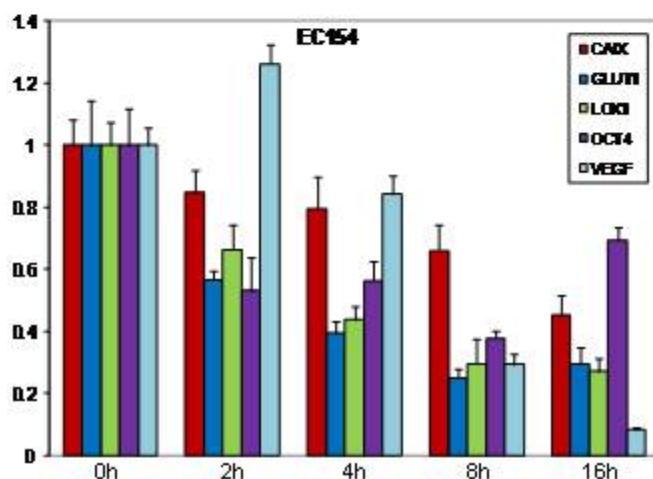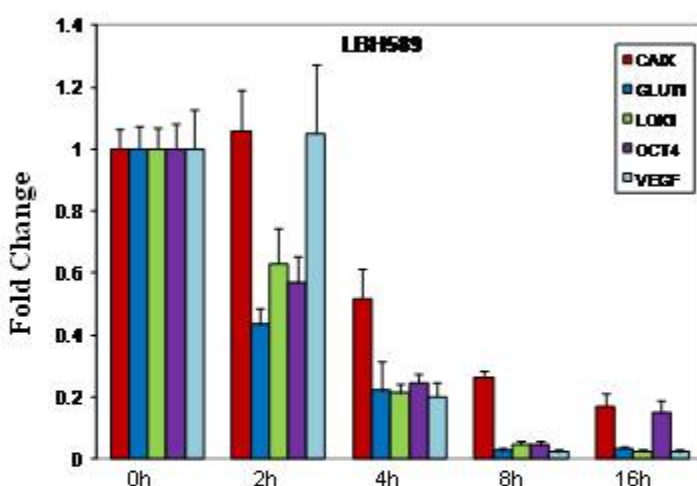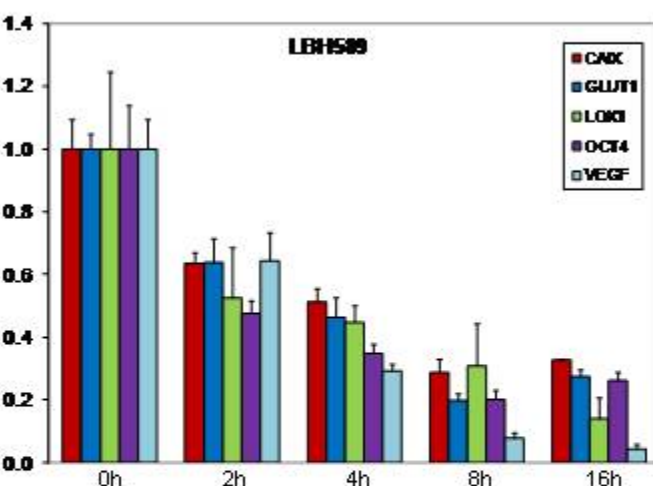

Supplement: MOESM8 [file 9462498]
